# Supplementary material for: Latency of mechanically stimulated escape responses in the Pacific spiny dogfish, Squalus suckleyi
Source: Oxford University Press journal article supplement (doi:10.1242/jeb.230698), 2021-01-11
Supplement: jeb230698supp.pdf [file jeb230698supp.pdf]

Table S1. Descriptive data and escape latency from the present study and available literature. Studies were only included if the experiments were done on single individuals that were either juvenile or adult. – indicates unreported values and \* indicates values that were found by extrapolating graphs as the values were not reported.

[Click here to Download Table S1](#)
